# Supplementary material for: A New Strategy for Silver Deposition on Au Nanoparticles with the Use of Peroxidase-Mimicking DNAzyme Monitored via a Localized Surface Plasmon Resonance Technique
Source: PubMed Central journal article supplement (PMC5424726; doi:10.3390/s17040849), 2017-04-13
Supplement: sensors-17-00849-s001.pdf [file sensors-17-00849-s001.pdf]

## Supplementary Materials

New strategy for silver deposition on Au nanoparticles with the use of peroxidase-mimicking DNAzyme monitored by Localized Surface Plasmon Resonance technique

J. Kosman<sup>1,+,§</sup>, J. Jatschka<sup>2,+</sup>, A. Csaki<sup>2</sup>, W. Fritzsche<sup>2</sup>, B. Juskowiak<sup>1</sup> and O. Stranik<sup>2</sup>

### Supplementary Figures

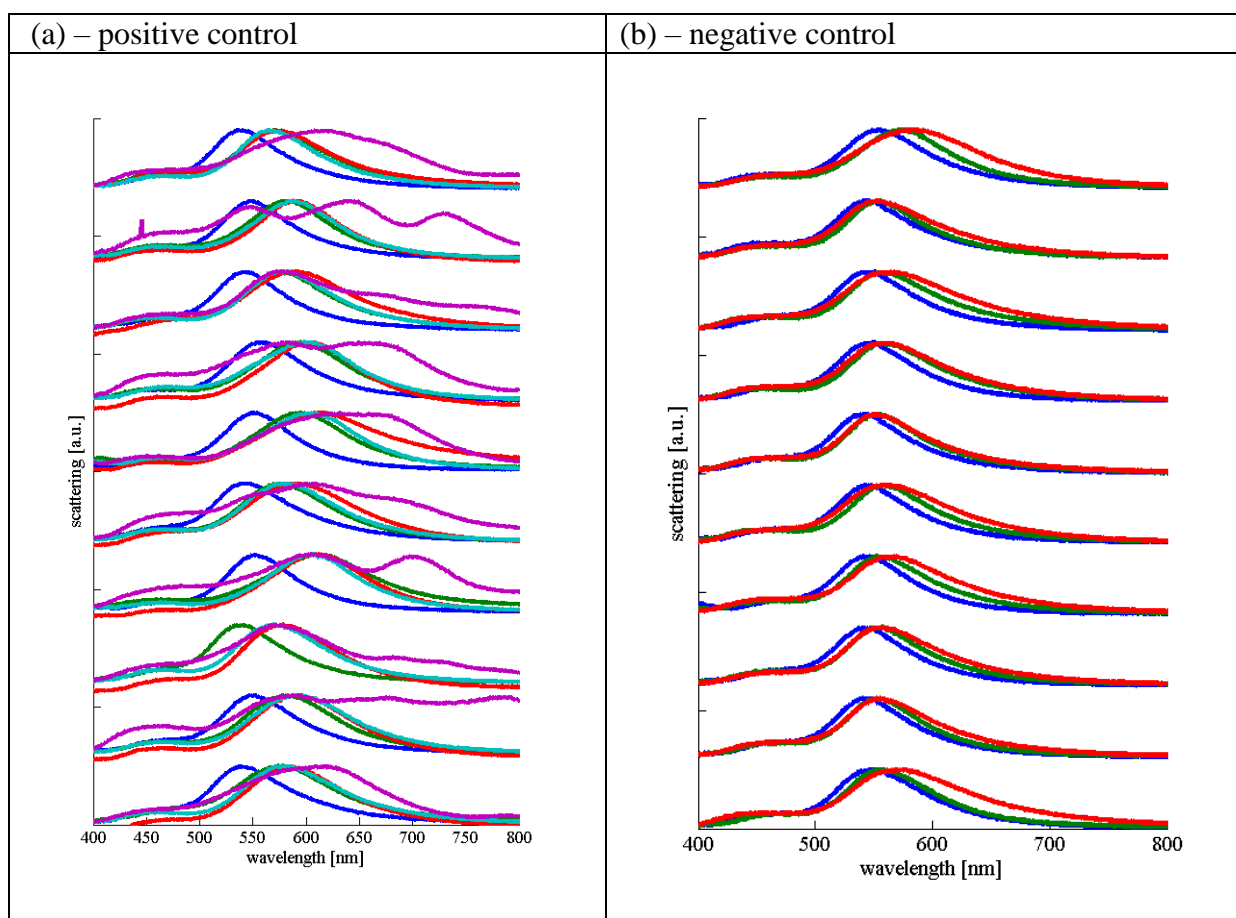

**Figure S1.** Scattering spectra of NPs at the different stages of the Ag deposition procedure (experiments A and B in Scheme 1). Each set of spectra represents one NP.

**Panel (a)** experiment A – positive control: bare NP (blue), after adsorption of ON1 DNA (green), after adsorption of MCH (red), after formation of DNAzyme -addition of K<sup>+</sup> and hemin solution (turquoise), after silver enhancement reaction (violet).

**Panel (b)**–experiment B - negative control: bare NP (blue), after adsorption of MCH (green), after silver enhancement reaction (red).

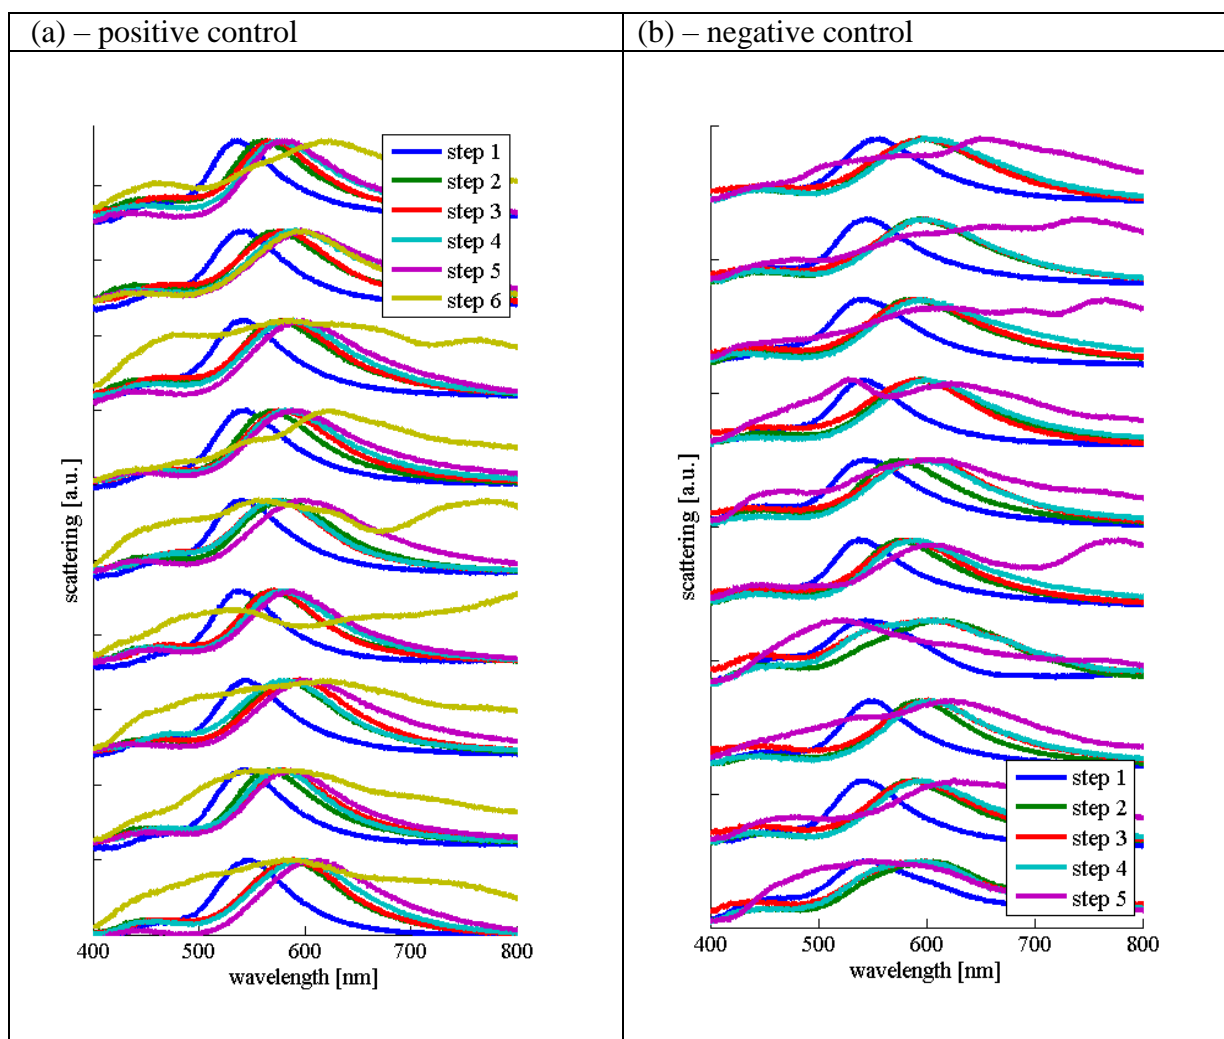

**Figure S2.** Scattering spectra of NPs at the different stages of the Ag deposition procedure (experiments E and D in Scheme 1). Each set of spectra represents one NP.

**Panel (a)** experiment E – positive control: bare NP (blue), after adsorption of OT1 DNA (green), after adsorption of MCH (red), after OT2 DNA hybridization (turquoise), after formation of DNAzyme - addition of  $K^+$  and hemin (violet), after silver enhancement reaction (yellow).

**Panel (b)**–experiment D - negative control: bare NP (blue), after adsorption of MCH (green), after incubation with OT2 probe (red), after addition of  $K^+$  and hemin (turquoise), after silver enhancement reaction (violet).

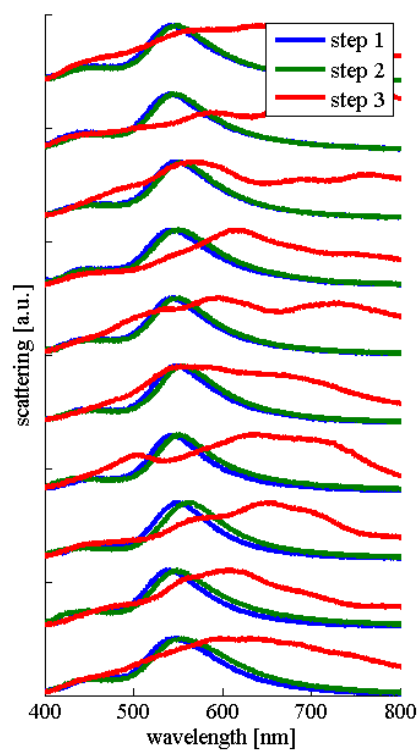

**Figure S3.** Scattering spectra of NPs at the different stages of the detection schema C in Scheme 1. Experiment C - negative control: bare NP (blue), after adsorption of MCH/OT1 (green), after silver enhancement reaction (red).

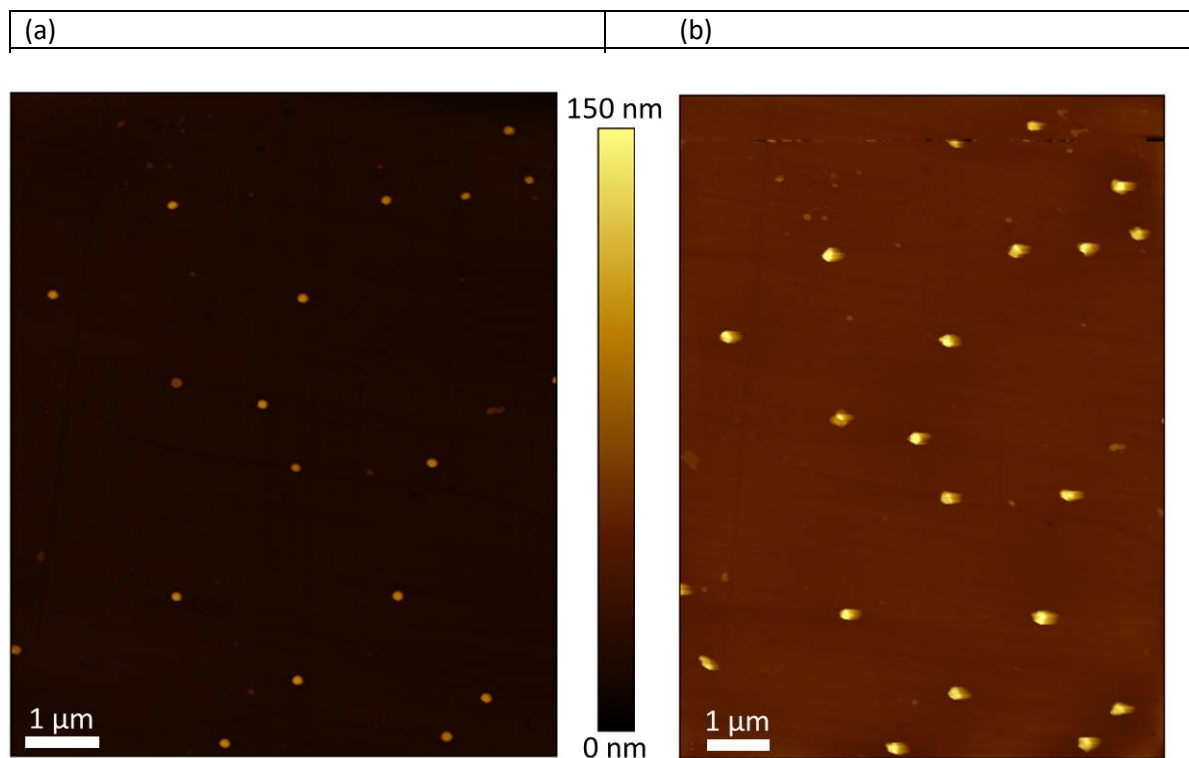

| Nanoparticle | Before Ag deposition (panel (a)) | After Ag deposition (panel (b)) | Nanoparticle | Before Ag deposition (panel (a)) | After Ag deposition (panel (b)) |
|--------------|----------------------------------|---------------------------------|--------------|----------------------------------|---------------------------------|
| NP1          | 82.3nm                           | 96.4nm                          | NP8          | 85.5nm                           | 100.2nm                         |
| NP2          | 81.1nm                           | 102.5nm                         | NP9          | 75.2nm                           | 112.5nm                         |
| NP3          | 82.2nm                           | 112.1nm                         | NP10         | 81.3nm                           | 115.2nm                         |
| NP4          | 67.7nm                           | 88.5nm                          | NP11         | 81.4nm                           | 114.4nm                         |
| NP5          | 76.4nm                           | 110.8nm                         | NP12         | 75.7nm                           | 85.9nm                          |
| NP6          | 75nm                             |                                 | NP13         | 74.5nm                           | 96.8nm                          |
| NP7          | 82.5nm                           | 116.1nm                         |              |                                  |                                 |

**Figure S4.** AFM images of nanoparticles with attached PS2.M-DNAzyme (route A in Scheme 1) before (a) and after (b) silver deposition reaction. Table summarizes heights of the nanoparticles shown in panel (a) and (b).

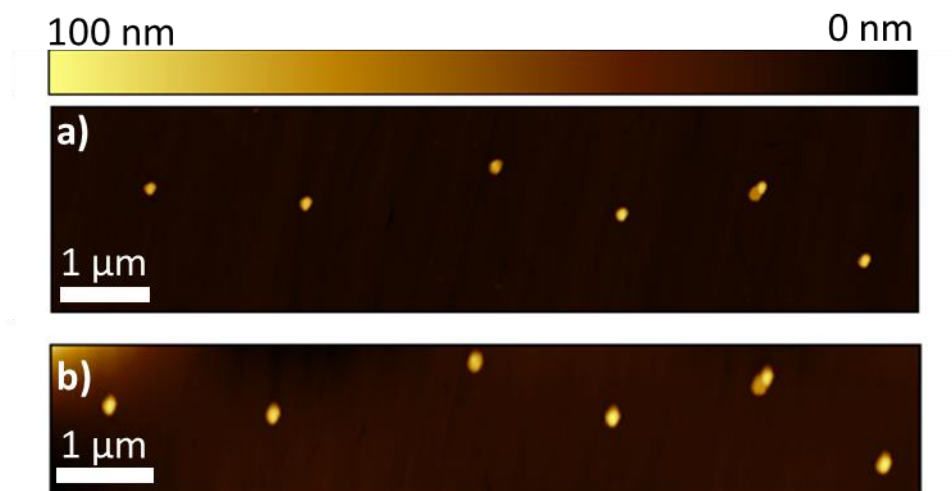

| Nanoparticle | Before Ag deposition (panel (a)) | After Ag deposition (panel (b)) | Nanoparticle | Before Ag deposition (panel (a)) | After Ag deposition (panel (b)) |
|--------------|----------------------------------|---------------------------------|--------------|----------------------------------|---------------------------------|
| NP1          | 85.9nm                           | 80.1nm                          | NP6          | 68.8nm                           | 76.1nm                          |
| NP2          | 80nm                             | 79.6nm                          | NP7          | 72.6nm                           | 77.8nm                          |
| NP3          | 86.3nm                           | 78.2nm                          | NP8          | 57.8nm                           | 70.6nm                          |
| NP4          | 82.3nm                           | 83nm                            | NP9          | 79.2nm                           | 73.1nm                          |
| NP5          | 87nm                             | 755nm                           | NP10         | 71.5nm                           | 82.5nm                          |

**Figure S5.:** AFM images of nanoparticles with attached PS2.M sequence but without hemin (negative control - route B in Scheme 1) before (a) and after (b) silver deposition reaction. Table summarizes heights of the nanoparticles before (panel (a)) and after (panel (b)) silver enhancement reaction.

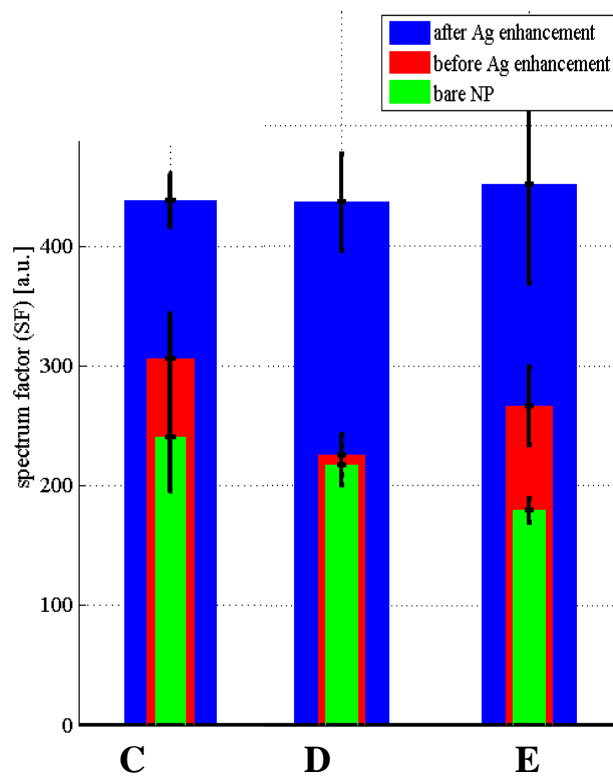

**Figure S6.** Average values of spectrum factor (SF) of spectra recorded for experiments with hybridization probes OT1 and OT2 (routes E and reference C, D in Scheme 1). Values of SF are show for the NPs without DNAzyme (reference C and D) and with DNAzyme (positive control). The SF equals the surface below the normalized spectrum. The low value of SF corresponds to sharper peak in the spectrum.

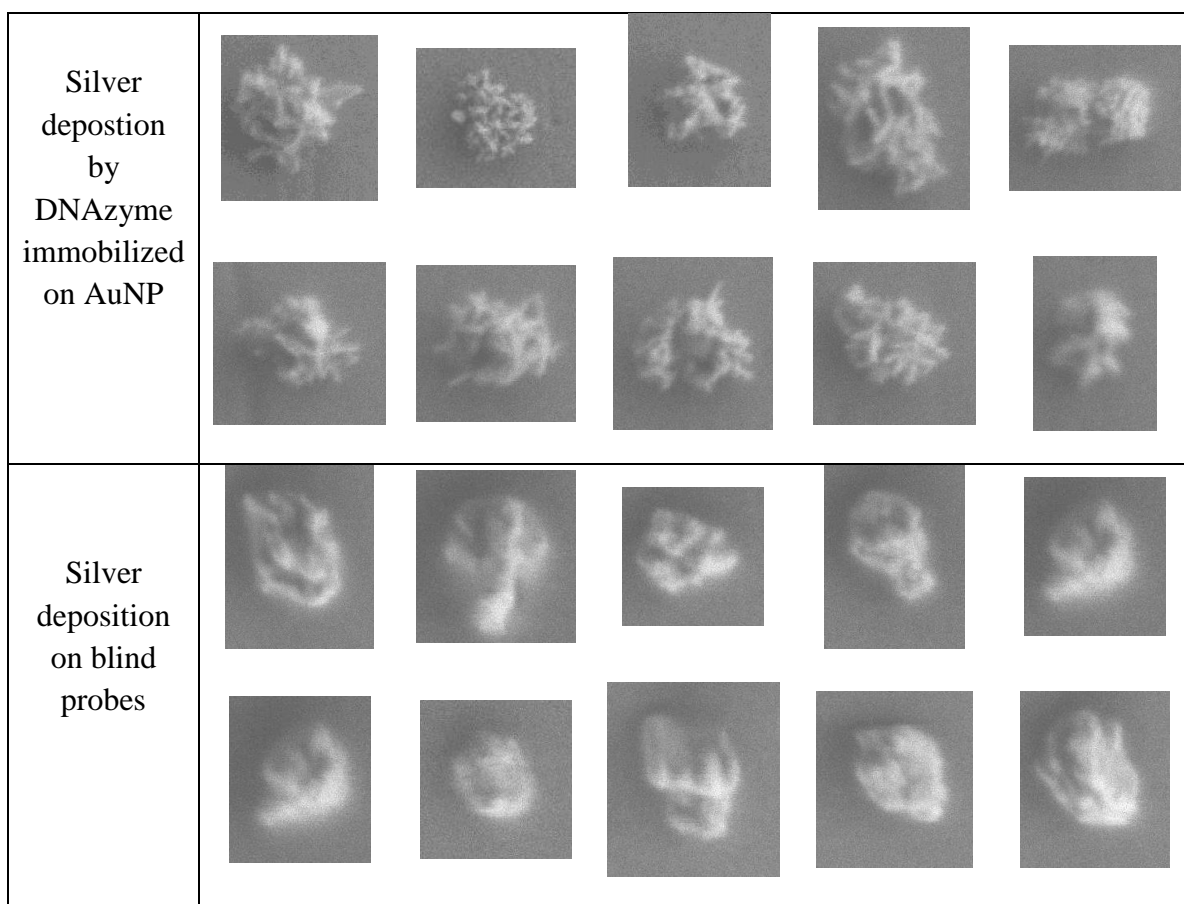

**Figure S7.** SEM images of silver enhanced Au nanoparticles in case of immobilized DNAzyme and in the case of nanoparticles without the DNAzyme. The Ag shell grown on NP with DNAzyme exhibits strong anisotropic star-like growth. The Ag shell grown on NP without DNAzyme does not have such a strong anisotropy.

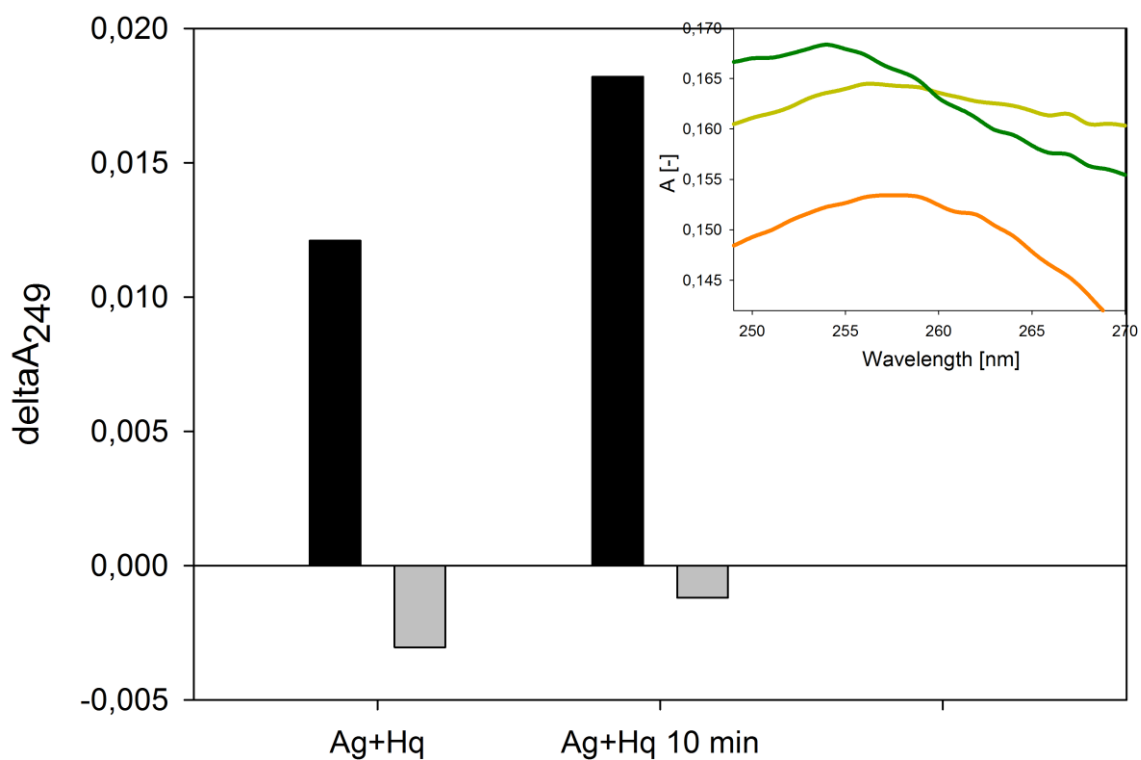

Figure S8. Progress in reaction of hydroquinone oxidation to quinone in silver reduction reaction monitored at 249 nm (black bare– DNAzyme, grey bare–reference probe without hemin). The bars corresponds to the differences between absorbance at 250 nm. The absorbance of the solution containing DNAzyme and silver is assumed as 0. Insert: UV-Vis spectra of DNAzyme system before hydroquinone addition (orange line), 1 minute after Hq addition, (grey) and after 10 minutes (black). Conditions: 10 mM Tris-Ac, 100 mM KAc, 1  $\mu$ M PS2.M, 1  $\mu$ M hemin, 6  $\mu$ M Hq, 6  $\mu$ M AgNO<sub>3</sub>.
